# Supplementary material for: GPER agonist G1 suppresses neuronal apoptosis mediated by endoplasmic reticulum stress after exertional heat stroke injury
Source: Research Square preprint supplement (doi:10.21203/rs.3.rs-8100858/v1), 2025-12-03
Supplement: Supplementary file 1 [file cb6f2860d084dc8e3a181a1d.pdf]

Supplementary Information: Full-length Uncropped Western Blots

Figure S1. Full-length uncropped Western blot images corresponding to Figure 5 in the main manuscript.

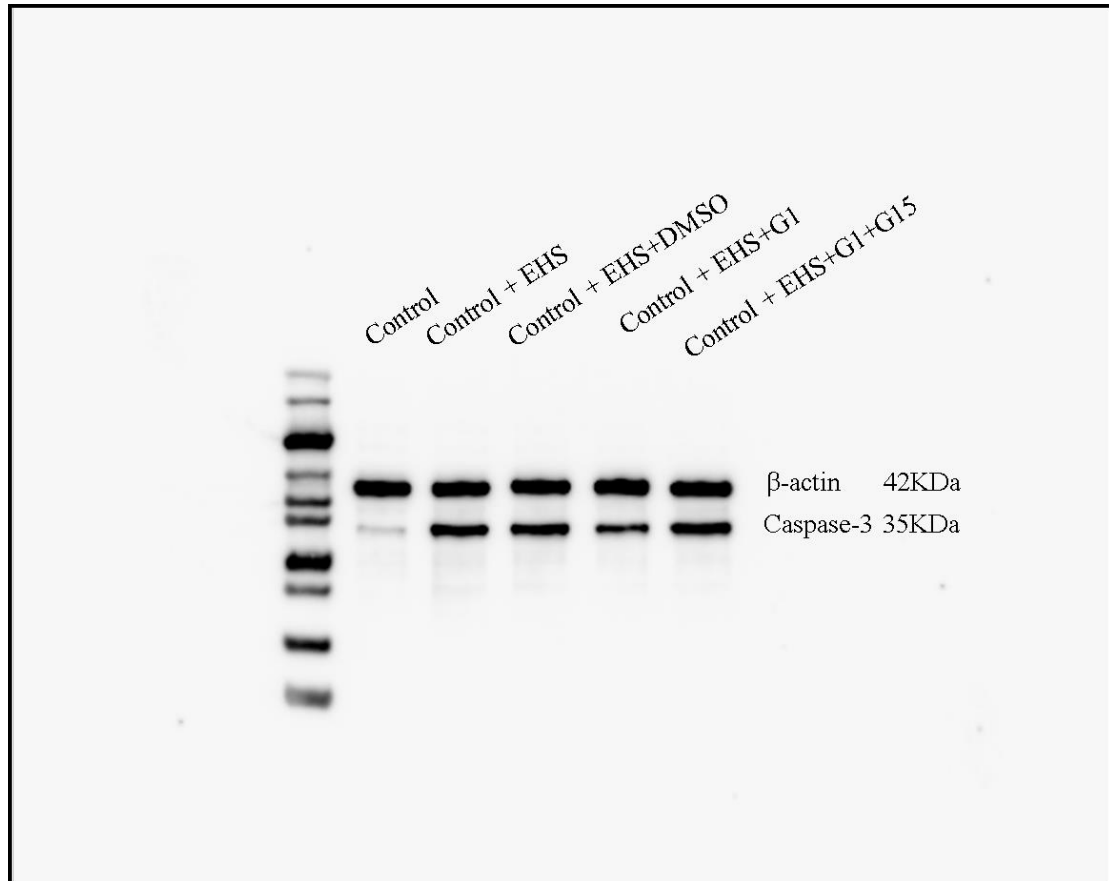

Figure 5C. Representative Western blot bands of Caspase-3

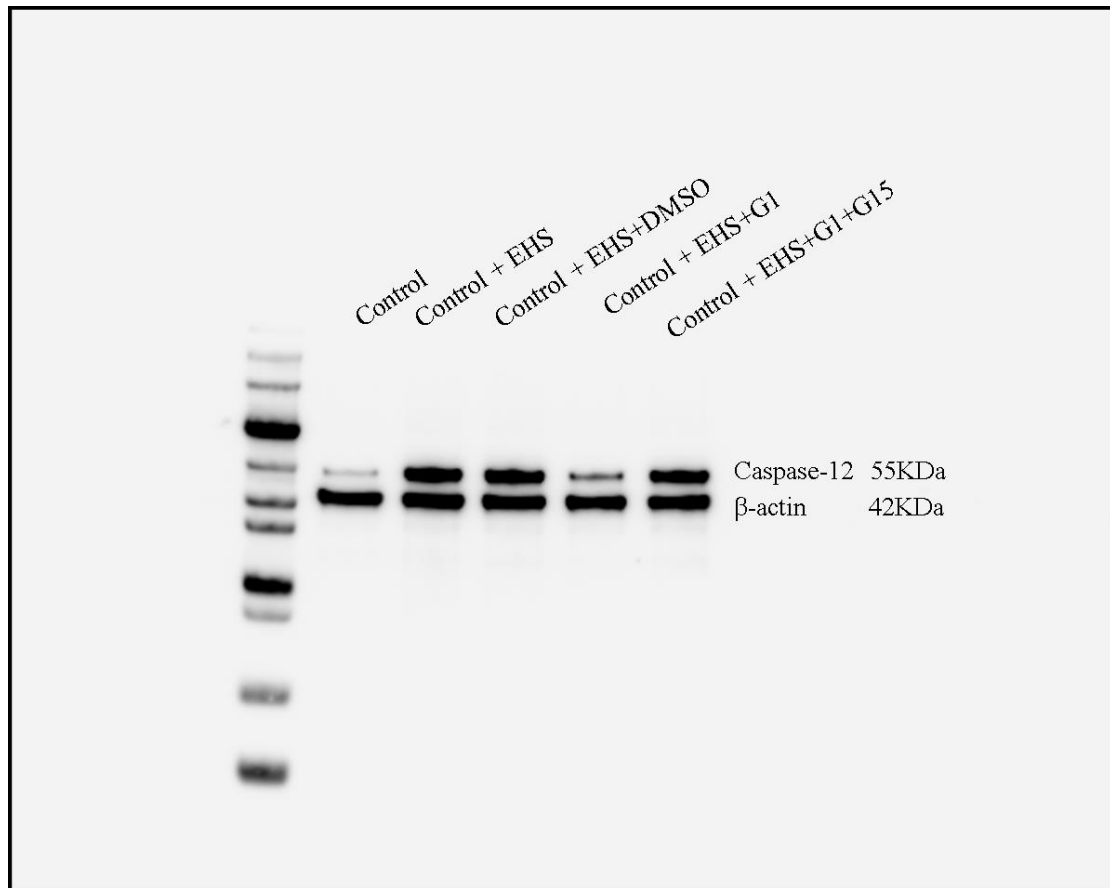

Figure 5C. Representative Western blot bands of Caspase-12

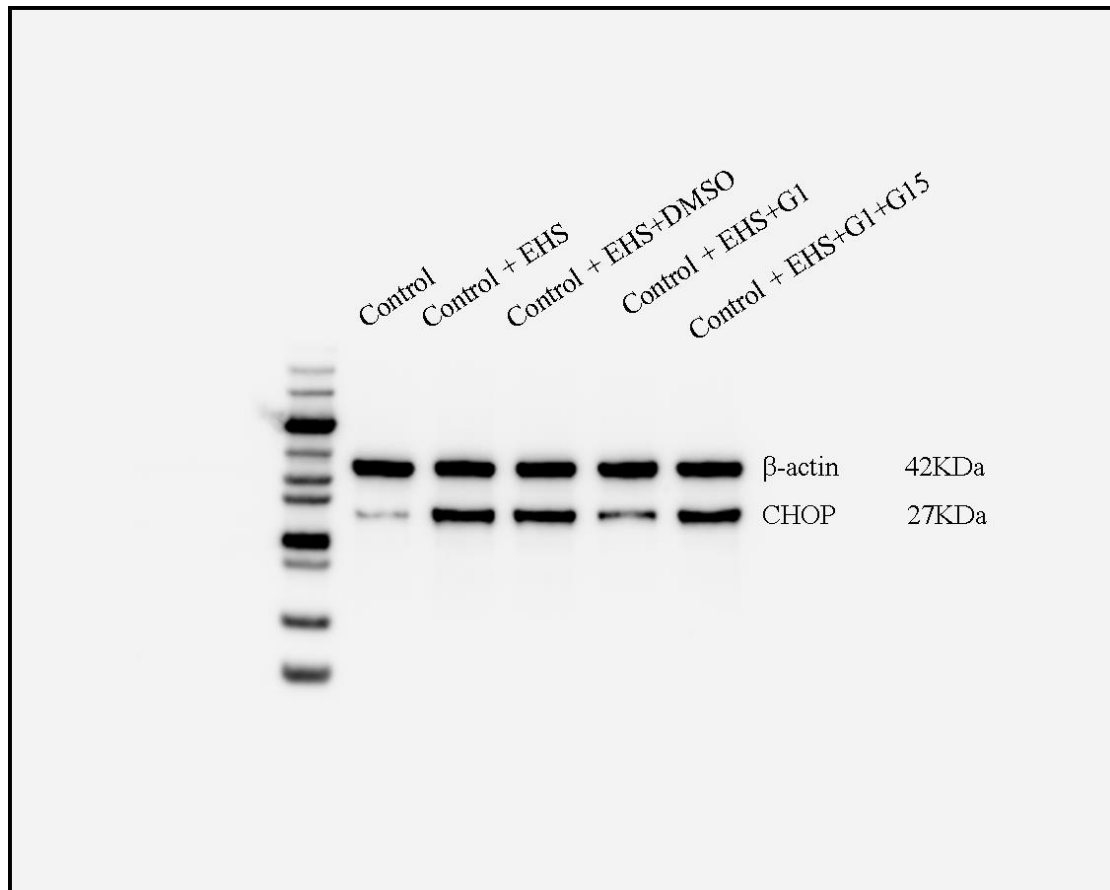

Figure 5C. Representative Western blot bands of CHOP

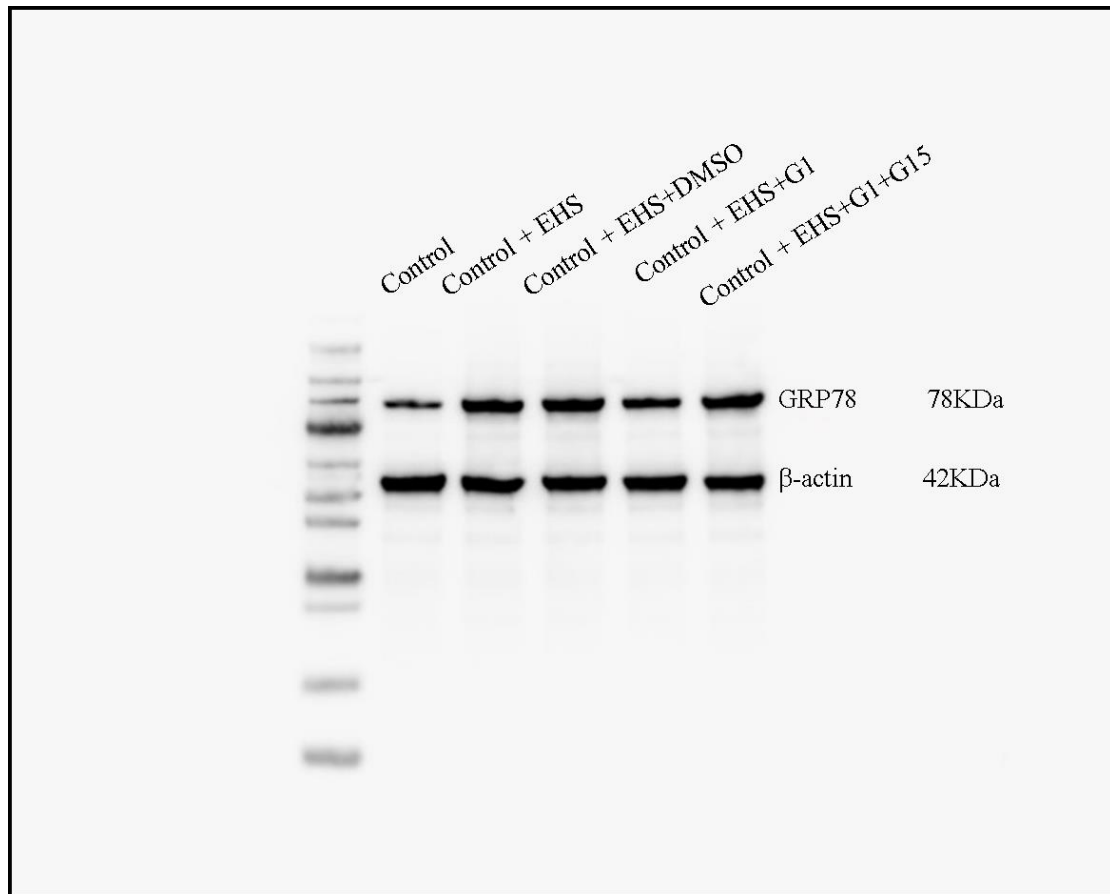

Figure 5C. Representative Western blot bands of GRP78
